# Supplementary material
Source: PubMed Central journal article supplement (PMC3973033)
Supplement: NIHMS566425-supplement-supplement_1.pdf [file NIHMS566425-supplement-supplement_1.pdf]

## Supplementary Materials for

### **Therapeutic Inflammatory Monocyte Modulation Using Immune-Modifying Microparticles**

Daniel R. Getts,\* Rachael L. Terry, Meghann Teague Getts, Celine Deffrasnes, Marcus Müller, Caryn van Vreden, Thomas M. Ashhurst, Belal Chami, Derrick McCarthy, Huiling Wu, Jin Ma, Aaron Martin, Lonnie D. Shae, Paul Witting, Geoffrey S. Kansas, Joachim Kühn, Wali Hafezi, Iain L. Campbell, David Reilly, Jana Say, Louise Brown, Melanie Y. White, Stuart J. Cordwell, Steven J. Chadban, Edward B. Thorp, Shisan Bao, Stephen D. Miller,\* Nicholas J. C. King\*

\*Corresponding author. E-mail: d-getts@northwestern.edu (D.R.G.); s-d-miller@northwestern.edu (S.D.M.); nickk@pathology.usyd.edu.au (N.J.C.K.)

Published 15 January 2014, *Sci. Transl. Med.* **6**, 219ra7 (2014)  
DOI: 10.1126/scitranslmed.3007563

#### **The PDF file includes:**

Materials and Methods

Fig. S1. PS-IMPs reduce cytokine and chemokine production in the WNV-infected brain.

Fig. S2. IMP clearance kinetics, lack of IMP localization to the brain, and PLGA-IMP treatment in TG peritonitis.

Fig. S3. IMP localization and marginal zone macrophage depletion.

Table S1. Particle physical properties.

Table S2. Opsonized proteins found on IMP.

## **SUPPLEMENTARY METHODS**

### **Multiplex ELISA**

Multiplex plate ELISA (Quansys Biosciences) was performed on brain homogenates using the Quansys Q-plex Mouse Cytokine Screen IR 16-plex according to the manufacturer's instructions. Plates were visualized on the Li-Cor Odyssey IR Imaging System (Li-Cor Biotechnology). Images were analyzed using Quansys Q-view software (Quansys Biosciences).

### **Protein Identification Liquid Chromatography**

As previously described (59), proteins were subject to GeLC-MS analysis. Briefly, proteins were reduced and alkylated in the presence of dithiothreitol and iodoacetamide. Bands were dried by vacuum centrifugation and incubated with 240ng trypsin for 1 hour at 4°C. Excess trypsin was removed and replaced with 50mM ammonium bicarbonate for incubation at 37°C overnight. Prior to mass spectrometric analysis peptides were concentrated and desalted with the use of pre-fabricated micro-columns containing Poros R2 resin (Perseptive Biosystems, Framingham MA). Peptides eluted were resolubilized in 0.1% formic acid and subject to reverse phase LC-MS/MS. Approximately 41,000 MS/MS spectra were generated from replicate LC-MS/MS experiments. Tandem mass spectra were extracted, charge state deconvoluted and deisotoped in Mascot and analyzed using Mascot and X!Tandem. Data were searched against Mus musculus (mouse) entries included in the SWISS-PROT databases with the significance threshold set at  $p < 0.05$ . Searches were conducted with a fragment ion mass tolerance of 15ppm and a parent ion tolerance of 0.2 Da. Methionine sulfoxide, carbamidomethyl-cysteine and deamidated asparagine and glutamine were specified as variable modifications. Scaffold was used integrate multiple MS/MS experiments and validate MS/MS based peptides and protein identifications. Peptides were considered only if Mascot ion scores exceeded 30, 40 and 40 for doubly, triply and quadruply charged peptides respectively. X!Tandem identifications required  $-\text{Log}(\text{Expect scores})$  scores greater than 2.0. Protein identifications were accepted if a

minimum of 2 peptides were identified matching the above criteria. Five proteins were considered identified although only matching one peptide. In this case, the peptides were sequenced on multiple occasions and sequence coverage obtained by the single peptide was greater than 5%.

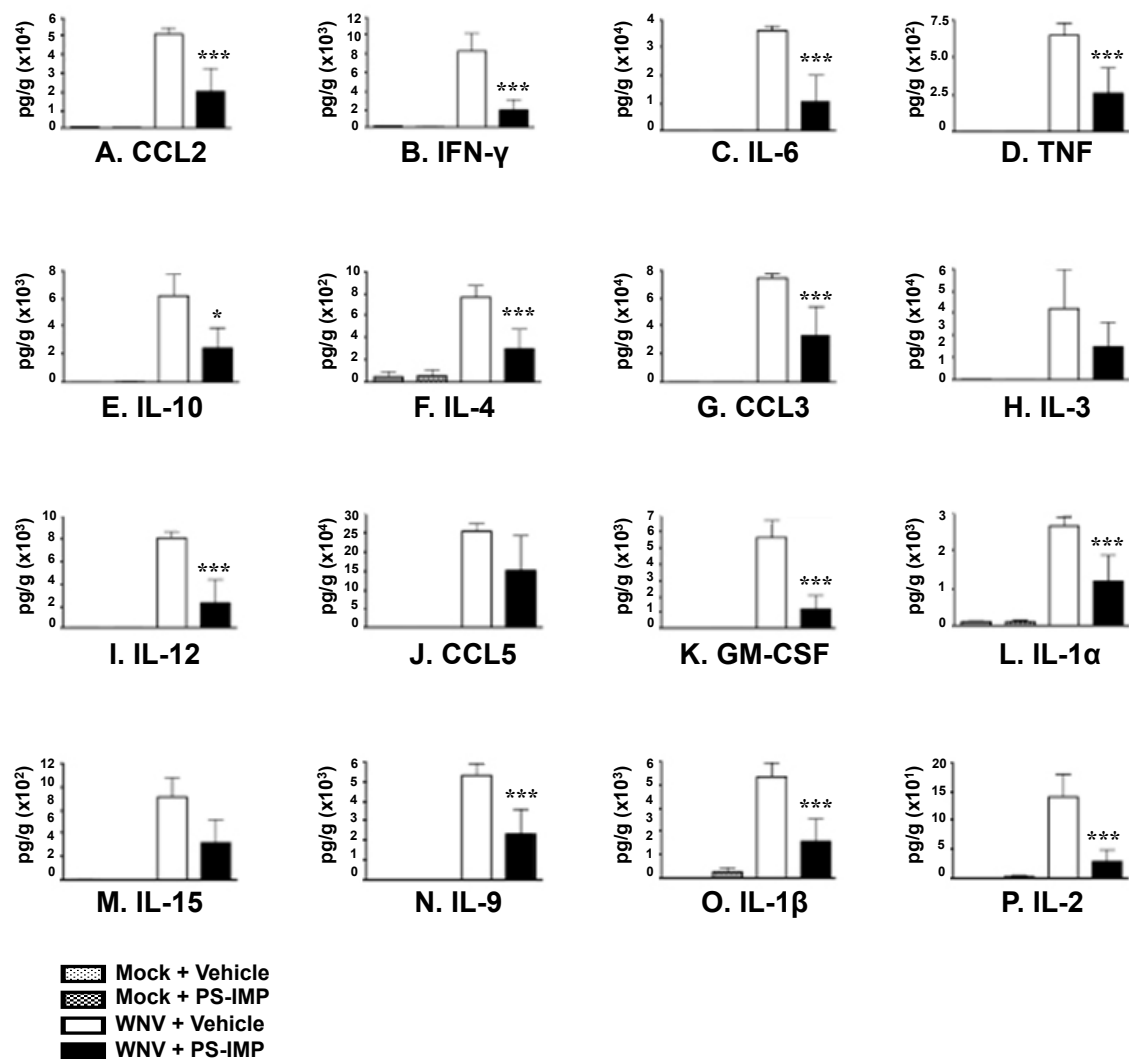

**Supplementary Figure 1. PS-IMP reduce cytokine and chemokine production in the WNV-infected brain.** Mock and WNV-infected brains were collected on D7 post infection after PS-IMP or vehicle infusion on day 6 post infection and processed for multiplex ELISA as described in the Materials and Methods. Levels of CCL2 (A), IFN- $\gamma$  (B), IL-6 (C), TNF (D), IL-10 (E), IL-4 (F), CCL3 (G), IL-12 (H), IL-3 (I), CCL5 (K), GM-CSF (L), IL-1 $\alpha$  (M), IL-15 (N), IL-9 (O), IL-1 $\beta$  (P) and IL-2 (Q) were examined. Multiplex ELISA is representative of at least 2 experiments with at least 3 mice per group.

### Supplementary Figure 2

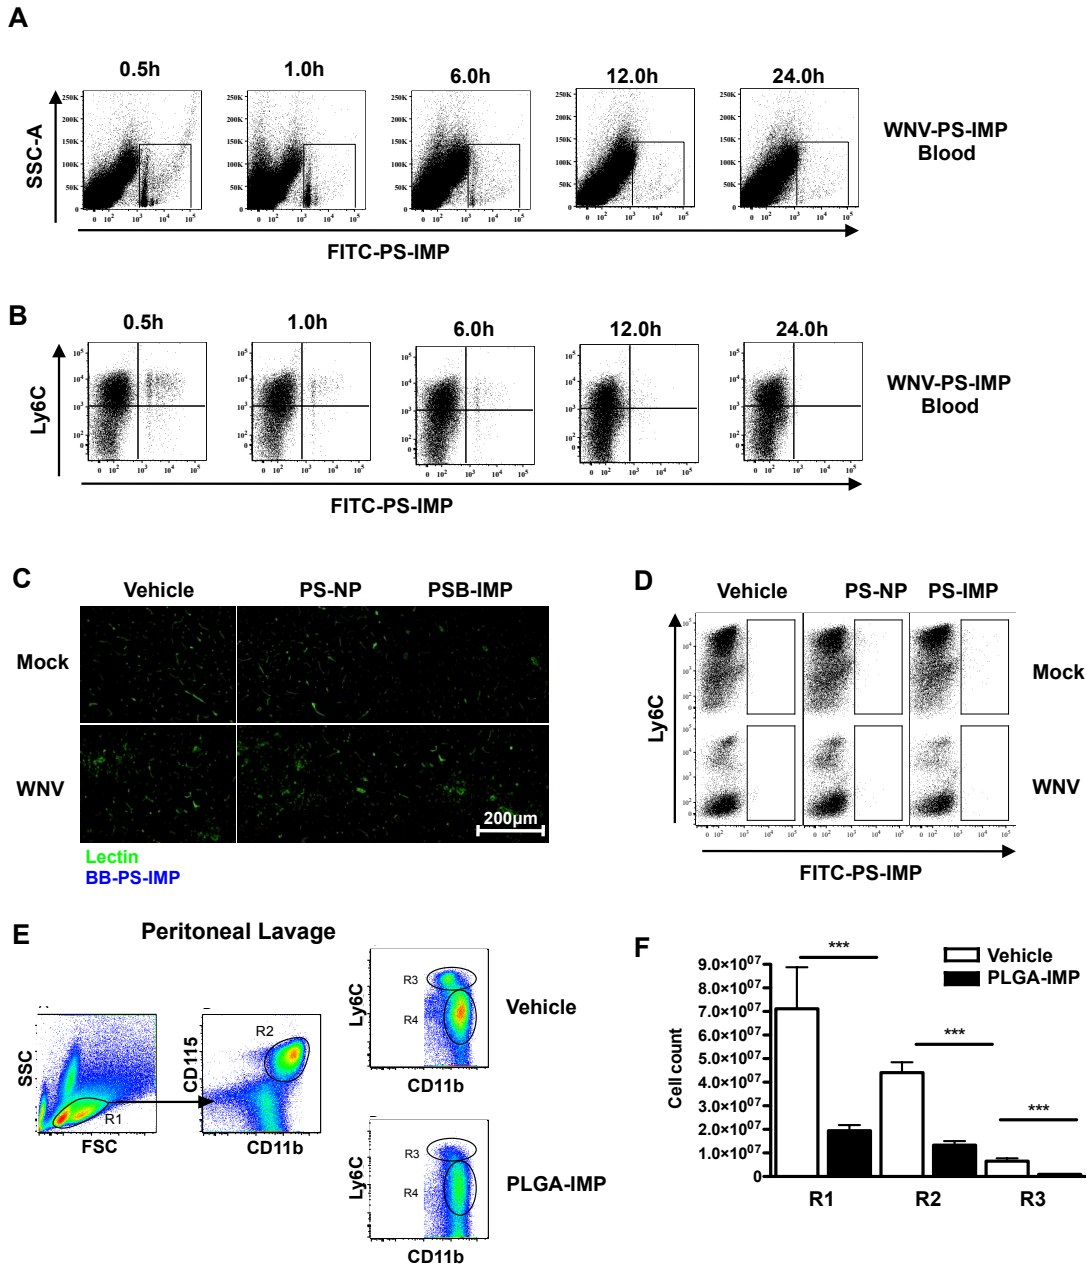

**Supplementary Figure 2**

**Supplementary Figure 2. IMP clearance kinetics, lack of IMP localization to the brain and PLGA-IMP treatment in TG peritonitis.** WNV infected mice were injected with FITC-PS-IMP on day 6 post infection and blood was isolated to determine clearance of IMP (A) and uptake (B) by Ly6C monocytes examined at the indicated time points. Mock and WNV

infected mice were injected with Bright-blue NP (blue), Bright-blue PS-IMP (blue) or vehicle on day 6 post infection and brains processed for lectin immunohistology on D7 post infection (**C**). Mock and WNV-infected mice were injected with FITC-PS-NP, FITCPS-IMP or vehicle on day 6 post infection and brains were processed for flow cytometry on D7 post infection, with CD45+ CD11b+ Ly6C+  $\Phi$ IM-derived macrophages gated and examined for FITC-IMP (**D**).

PLGA-IMP efficacy was examined 24 hours after TG injection, WT mice were injected with PS-IMP or vehicle control i.v. 24 hours later, flow cytometry was used to determine the numbers of CD115+CD11b+Ly6ChiLy6G-  $\Phi$ IM-derived macrophages (R3, **E**) in the peritoneal cavity(**E,F**). Immunohistology and flow cytometry data represent three separate experiments, with at least 3 mice/group. Slides were counterstained with lectin (green) to identify microglia, endothelium and myeloid lineage cells. Flow cytometry data are means  $\pm$  SD and represent three separate experiments with 4-5 mice/group. Statistical analysis was conducted using one-way ANOVA and Tukey-Kramer post-test.  $P \leq 0.05$  (\*),  $P \leq 0.01$  (\*\*),  $P \leq 0.001$  (\*\*\*), in comparing PS-IMP and NP groups to vehicle control groups.  $P \leq 0.05$  (#),  $P \leq 0.01$  (##),  $P \leq 0.001$  (###), in comparing PS-IMP to NP groups.

A

WNV + FITC-PS-IMP

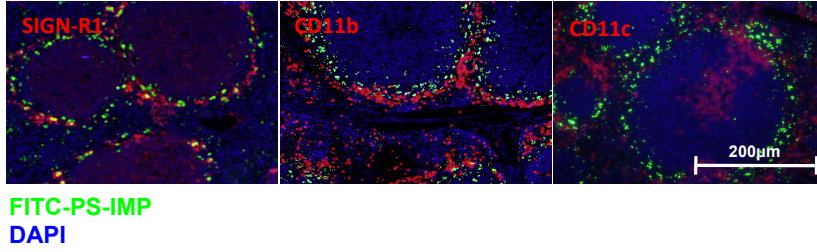

B

PBS Clodronate 14h Clodronate 48h Clodronate 72h

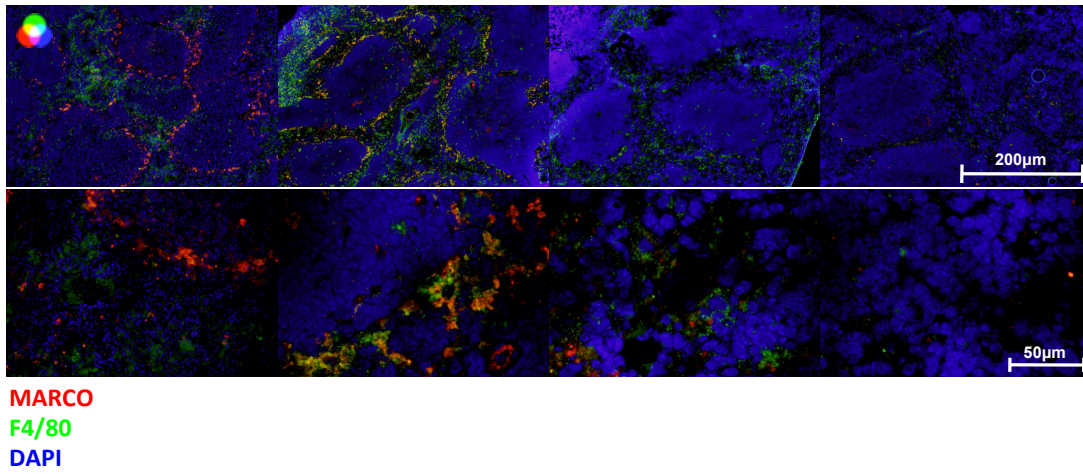

C

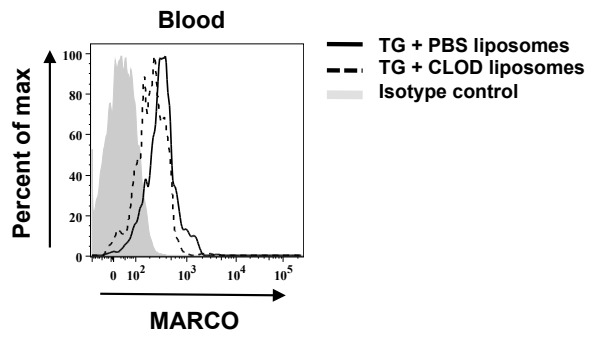

Supplementary Figure 3

**Supplementary Figure 3. IMP localization and Marginal Zone Macrophage Depletion.**

WNV-infected mice were injected with FITC-PS-IMP (green, **a**) and spleens were processed for fluorescent SIGN-R1, CD11b, or CD11c immunohistology 24 hours later (day 7 post infection) (red, **A**). Slides were counterstained with DAPI (blue) to identify cell nuclei. Mice were injected with PBS or clodronate liposomes and spleens were processed for fluorescent MARCO and F4/80 immunohistochemistry 14, 48 and 72h later (**B**). Mice were injected with PBS or clodronate liposomes and injected with TG 24 hours later. MARCO expression on blood CD11b<sup>+</sup> Ly6Chi Ly6G<sup>-</sup> cells was examined by flow cytometry 24 hours after TG injection (**C**). Flow cytometry data represent three separate experiments with 4-5 mice/group. Immunohistology are representative of at least 3 experiments with at least 3 mice per group.



**SUPPLEMENTARY TABLE 1. Particle Physical Properties**

| Physical Properties                 |                                                                                                                |                                                                                                                |                                                                                                                |                                                                           |                                                                                                                      |
|-------------------------------------|----------------------------------------------------------------------------------------------------------------|----------------------------------------------------------------------------------------------------------------|----------------------------------------------------------------------------------------------------------------|---------------------------------------------------------------------------|----------------------------------------------------------------------------------------------------------------------|
|                                     | Immune Modified (Carboxylated) Polystyrene Particles (Phosphorex)*                                             | Polystyrene Neutral Particles (Phosphorex)*                                                                    | Polystyrene Positive Charged (Aminated Particles-Phosphorex)*                                                  | Immune Modified Nano-Diamonds (University of Sydney)                      | Immune Modified (Carboxylated) PLGA Particles (Phosphorex)*                                                          |
| Chemical Formula                    | 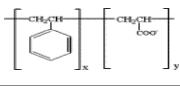                              |                               |                               | C                                                                         |                                   |
| Color                               | white latex                                                                                                    | white latex                                                                                                    | white latex                                                                                                    | Milky white (solution)                                                    | White powder (lyophilized)                                                                                           |
| Odor                                | None                                                                                                           | None                                                                                                           | None                                                                                                           | Odourless                                                                 | None                                                                                                                 |
| Melting point TM/°C                 | 240°C                                                                                                          | 240°C                                                                                                          | 240°C                                                                                                          | 4500 K                                                                    | N/A (amorphous)                                                                                                      |
| Glass Transition/°C                 | 100°C                                                                                                          | 100°C                                                                                                          | 100°C                                                                                                          | N/A                                                                       | 40-55°C                                                                                                              |
| Solubility                          | Insoluble in water or alcohols, soluble in acetone, ethyl acetate, THF, DMF, toluene, methylene chloride, etc. | Insoluble in water or alcohols, soluble in acetone, ethyl acetate, THF, DMF, toluene, methylene chloride, etc. | Insoluble in water or alcohols, soluble in acetone, ethyl acetate, THF, DMF, toluene, methylene chloride, etc. | N/A                                                                       | Insoluble in water, soluble in acetone, ethyl acetate, DMSO, DMF, acetonitrile, chloroform, methylene chloride, etc. |
| Co-Polymer ratio, mol( %)           | 90:10                                                                                                          | 100:0                                                                                                          | 90:10                                                                                                          | N/A                                                                       | 50:50                                                                                                                |
| Melt Index g/10 Minutes, 200°C/5 kg | 6.0-9.0                                                                                                        | 6.0-9.0                                                                                                        | 6.0-9.0                                                                                                        | N/A                                                                       | N/A                                                                                                                  |
| Molecular weight (kDa)              | 10-250                                                                                                         | 10-250                                                                                                         | 10-250                                                                                                         | 22,000,000KD                                                              | 5-50                                                                                                                 |
| Heavy metals (ppm)                  | unknown                                                                                                        | unknown                                                                                                        | unknown                                                                                                        | 0-0.55% Nickel<br>0-0.50 Copper<br>prior to carboxylation by acid washing | <10                                                                                                                  |
| Sulphate Ash (%)                    | unknown                                                                                                        | unknown                                                                                                        | unknown                                                                                                        | N/A                                                                       | <0.1                                                                                                                 |
| Size distribution                   | 10.4%                                                                                                          | 2.4%                                                                                                           | 10.4%                                                                                                          | 270 ± 30 nm                                                               | 10-50%                                                                                                               |
| Zeta Potential                      | -40 ~ -50 mv                                                                                                   | -5 ~ +5 mv                                                                                                     | +20 ~ +40 mv                                                                                                   | -50.6 +/- 3 mV                                                            | -30~ -50 mV                                                                                                          |

\*Particles designed to investigator specification

**SUPPLEMENTARY TABLE 2. Osonized Proteins Found on IMP**

| Identified Proteins                                  | SWISSProt Accession Number | Gene Name | pI   | Molecular Weight | Unique Peptides Identified | % Sequence Coverage |
|------------------------------------------------------|----------------------------|-----------|------|------------------|----------------------------|---------------------|
| 14-3-3 protein zeta/delta                            | I433Z_MOUSE                | Ywhaz     | 4.73 | 28 kDa           | 3                          | 12%                 |
| Protein 4.1                                          | 4I_MOUSE                   | Epb41     | 5.43 | 96 kDa           | 4                          | 6.10%               |
| Alpha-1-antitrypsin 1-1                              | A1AT1_MOUSE                | Serpina1a | 5.44 | 46 kDa           | 3                          | 4.60%               |
| Actin, cytoplasmic 1                                 | ACTB_MOUSE                 | Actb      | 5.29 | 42 kDa           | 11                         | 39%                 |
| Alpha-actinin-1                                      | ACTN1_MOUSE                | Actn1     | 5.23 | 103 kDa          | 2                          | 2.50%               |
| Alpha-adducin                                        | ADDA_MOUSE                 | Add1      | 5.62 | 81 kDa           | 2                          | 3.10%               |
| ADP/ATP translocase 1                                | ADT1_MOUSE                 | Slc25a4   | 9.73 | 33 kDa           | 2                          | 8.10%               |
| Serum albumin                                        | ALBU_MOUSE                 | Alb       | 5.53 | 69 kDa           | 14                         | 29%                 |
| Ankyrin-1                                            | ANK1_MOUSE                 | Ank1      | 6.09 | 204 kDa          | 5                          | 3.30%               |
| Annexin A2                                           | ANXA2_MOUSE                | Anxa2     | 7.53 | 39 kDa           | 6                          | 20%                 |
| Annexin A5                                           | ANXA5_MOUSE                | Anxa5     | 4.82 | 36 kDa           | 3                          | 9.40%               |
| Acylamino-acid-releasing enzyme                      | APEH_MOUSE                 | Apeh      | 5.36 | 82 kDa           | 4                          | 6.10%               |
| Apolipoprotein A-I                                   | APOA1_MOUSE                | Apoa1     | 5.31 | 31 kDa           | 6                          | 21%                 |
| Apolipoprotein A-IV                                  | APOA4_MOUSE                | Apoa4     | 5.21 | 45 kDa           | 2                          | 7.10%               |
| Apolipoprotein C-IV                                  | APOC4_MOUSE                | Apoc4     | 9.23 | 14 kDa           | 2                          | 16%                 |
| Apolipoprotein E                                     | APOE_MOUSE                 | ApoE      | 5.46 | 36 kDa           | 12                         | 38%                 |
| Beta-2-glycoprotein 1                                | APOH_MOUSE                 | Apoh      | 8.62 | 39 kDa           | 5                          | 19%                 |
| Sodium/potassium-transporting ATPase subunit alpha-1 | AT1A1_MOUSE                | Atp1a1    | 5.27 | 113 kDa          | 5                          | 5.80%               |
| Sarcoplasmic/endoplasmic reticulum calcium ATPase 1  | AT2A1_MOUSE                | Atp2a1    | 5.13 | 109 kDa          | 8                          | 10%                 |
| ATP synthase subunit alpha, mitochondrial            | ATPA_MOUSE                 | Atp5a1    | 8.28 | 60 kDa           | 6                          | 13%                 |
| ATP synthase subunit beta, mitochondrial             | ATPB_MOUSE                 | Atp5b     | 4.99 | 56 kDa           | 7                          | 19%                 |
| Band 3 anion transport protein                       | B3AT_MOUSE                 | Slc4a1    | 5.31 | 103 kDa          | 11                         | 16%                 |
| Flavin reductase (NADPH)                             | BLVRB_MOUSE                | Blvrb     | 6.47 | 22 kDa           | 6                          | 46%                 |
| Complement C1q subcomponent subunit A                | C1QA_MOUSE                 | C1qa      | 9.48 | 26 kDa           | 4                          | 21%                 |
| Complement C1q subcomponent subunit B                | C1QB_MOUSE                 | C1qb      | 8.34 | 27 kDa           | 6                          | 27%                 |
| Complement C1q subcomponent subunit C                | C1QC_MOUSE                 | C1qc      | 8.88 | 26 kDa           | 4                          | 16%                 |
| C-1-tetrahydrofolate synthase, cytoplasmic           | C1TC_MOUSE                 | Mthfd1    | 6.73 | 101 kDa          | 4                          | 5.50%               |
| C4b-binding protein                                  | C4BPA_MOUSE                | C4bpa     | 5.97 | 52 kDa           | 4                          | 12%                 |
| Carbonic anhydrase 1                                 | CAH1_MOUSE                 | Ca1       | 6.47 | 28 kDa           | 4                          | 20%                 |
| Carbonic anhydrase 2                                 | CAH2_MOUSE                 | Ca2       | 6.48 | 29 kDa           | 6                          | 37%                 |
| Catalase                                             | CATA_MOUSE                 | Cat       | 7.72 | 60 kDa           | 7                          | 17%                 |
| Clathrin heavy chain 1                               | CLH1_MOUSE                 | Cltc      | 5.48 | 192 kDa          | 8                          | 6.20%               |
| Complement C3                                        | CO3_MOUSE                  | C3        | 6.3  | 186 kDa          | 30                         | 22%                 |
| Cofilin-1                                            | COF1_MOUSE                 | Cfl1      | 8.26 | 19 kDa           | 1                          | 6.60%               |
| Uroporphyrinogen decarboxylase                       | DCUP_MOUSE                 | Urod      | 6.21 | 41 kDa           | 3                          | 9.00%               |
| Desmoplakin                                          | DESP_MOUSE                 | Dsp       | 6.43 | 333 kDa          | 2                          | 0.80%               |
| Elongation factor 1-alpha 1                          | EF1A1_MOUSE                | Eef1a1    | 9.1  | 50 kDa           | 6                          | 16%                 |
| Elongation factor 1-delta                            | EF1D_MOUSE                 | Eef1d     | 4.91 | 31 kDa           | 2                          | 8.50%               |
| Elongation factor 2                                  | EF2_MOUSE                  | Eef2      | 6.42 | 95 kDa           | 4                          | 4.50%               |
| 55 kDa erythrocyte membrane protein                  | EM55_MOUSE                 | Mpp1      | 6.72 | 52 kDa           | 3                          | 7.50%               |
| Alpha-enolase                                        | ENOA_MOUSE                 | Eno1      | 6.36 | 47 kDa           | 2                          | 9.70%               |
| Endoplasmin                                          | ENPL_MOUSE                 | Hsp90b1   | 4.72 | 92 kDa           | 3                          | 5.50%               |
| Erythrocyte membrane protein band 4.2                | EPB42_MOUSE                | Epb42     | 6.98 | 77 kDa           | 2                          | 3.30%               |
| Ezrin                                                | EZRI_MOUSE                 | Ezr       | 5.83 | 69 kDa           | 6                          | 10%                 |
| Coagulation factor V                                 | FA5_MOUSE                  | F5        | 5.66 | 247 kDa          | 4                          | 2.60%               |
| Alpha-2-HS-glycoprotein                              | FETUA_MOUSE                | Ahsg      | 5.94 | 37 kDa           | 2                          | 9.90%               |
| Fibrinogen beta chain                                | FIBB_MOUSE                 | Fgb       | 3.53 | 55 kDa           | 13                         | 35%                 |
| Fibrinogen gamma chain                               | FIBG_MOUSE                 | Fgg       | 5.55 | 49 kDa           | 13                         | 34%                 |

**SUPPLEMENTARY TABLE 2**

| Identified Proteins                                  | SWISSProt Accession Number | Gene Name | pI   | Molecular Weight | Unique Peptides Identified | % Sequence Coverage |
|------------------------------------------------------|----------------------------|-----------|------|------------------|----------------------------|---------------------|
| 14-3-3 protein zeta/delta                            | I433Z_MOUSE                | Ywhaz     | 4.73 | 28 kDa           | 3                          | 12%                 |
| Protein 4.1                                          | 4I_MOUSE                   | Epb41     | 5.43 | 96 kDa           | 4                          | 6.10%               |
| Alpha-1-antitrypsin 1-1                              | A1AT1_MOUSE                | Serpina1a | 5.44 | 46 kDa           | 3                          | 4.60%               |
| Actin, cytoplasmic 1                                 | ACTB_MOUSE                 | Actb      | 5.29 | 42 kDa           | 11                         | 39%                 |
| Alpha-actinin-1                                      | ACTN1_MOUSE                | Actn1     | 5.23 | 103 kDa          | 2                          | 2.50%               |
| Alpha-adducin                                        | ADDA_MOUSE                 | Add1      | 5.62 | 81 kDa           | 2                          | 3.10%               |
| ADP/ATP translocase 1                                | ADT1_MOUSE                 | Slc25a4   | 9.73 | 33 kDa           | 2                          | 8.10%               |
| Serum albumin                                        | ALBU_MOUSE                 | Alb       | 5.53 | 69 kDa           | 14                         | 29%                 |
| Ankyrin-1                                            | ANK1_MOUSE                 | Ank1      | 6.09 | 204 kDa          | 5                          | 3.30%               |
| Annexin A2                                           | ANXA2_MOUSE                | Anxa2     | 7.53 | 39 kDa           | 6                          | 20%                 |
| Annexin A5                                           | ANXA5_MOUSE                | Anxa5     | 4.82 | 36 kDa           | 3                          | 9.40%               |
| Acylamino-acid-releasing enzyme                      | APEH_MOUSE                 | Apeh      | 5.36 | 82 kDa           | 4                          | 6.10%               |
| Apolipoprotein A-1                                   | APOA1_MOUSE                | Apoa1     | 5.31 | 31 kDa           | 6                          | 21%                 |
| Apolipoprotein A-IV                                  | APOA4_MOUSE                | Apoa4     | 5.21 | 45 kDa           | 2                          | 7.10%               |
| Apolipoprotein C-IV                                  | APOC4_MOUSE                | Apoc4     | 9.23 | 14 kDa           | 2                          | 16%                 |
| Apolipoprotein E                                     | APOE_MOUSE                 | ApoE      | 5.46 | 36 kDa           | 12                         | 38%                 |
| Beta-2-glycoprotein 1                                | APOH_MOUSE                 | ApoH      | 8.62 | 39 kDa           | 5                          | 19%                 |
| Sodium/potassium-transporting ATPase subunit alpha-1 | AT1A1_MOUSE                | Atp1a1    | 5.27 | 113 kDa          | 5                          | 5.80%               |
| Sarcoplasmic/endoplasmic reticulum calcium ATPase 1  | AT2A1_MOUSE                | Atp2a1    | 5.13 | 109 kDa          | 8                          | 10%                 |
| ATP synthase subunit alpha, mitochondrial            | ATPA_MOUSE                 | Atp5a1    | 8.28 | 60 kDa           | 6                          | 13%                 |
| ATP synthase subunit beta, mitochondrial             | ATPB_MOUSE                 | Atp5b     | 4.99 | 56 kDa           | 7                          | 19%                 |
| Band 3 anion transport protein                       | B3AT_MOUSE                 | Slc4a1    | 5.31 | 103 kDa          | 11                         | 16%                 |
| Flavin reductase (NADPH)                             | BLVRB_MOUSE                | Blvrb     | 6.47 | 22 kDa           | 6                          | 46%                 |
| Complement C1q subcomponent subunit A                | C1QA_MOUSE                 | C1qa      | 9.48 | 26 kDa           | 4                          | 21%                 |
| Complement C1q subcomponent subunit B                | C1QB_MOUSE                 | C1qb      | 8.34 | 27 kDa           | 6                          | 27%                 |
| Complement C1q subcomponent subunit C                | C1QC_MOUSE                 | C1qc      | 8.88 | 26 kDa           | 4                          | 16%                 |
| C-1-tetrahydrofolate synthase, cytoplasmic           | C1TC_MOUSE                 | Mthfd1    | 6.73 | 101 kDa          | 4                          | 5.50%               |
| C4b-binding protein                                  | C4BPA_MOUSE                | C4bpa     | 5.97 | 52 kDa           | 4                          | 12%                 |
| Carbonic anhydrase 1                                 | CAH1_MOUSE                 | Ca1       | 6.47 | 28 kDa           | 4                          | 20%                 |
| Carbonic anhydrase 2                                 | CAH2_MOUSE                 | Ca2       | 6.48 | 29 kDa           | 6                          | 37%                 |
| Catalase                                             | CATA_MOUSE                 | Cat       | 7.72 | 60 kDa           | 7                          | 17%                 |
| Clathrin heavy chain 1                               | CLH1_MOUSE                 | Cltc      | 5.48 | 192 kDa          | 8                          | 6.20%               |
| Complement C3                                        | CO3_MOUSE                  | C3        | 6.3  | 186 kDa          | 30                         | 22%                 |
| Cofilin-1                                            | COF1_MOUSE                 | Cfl1      | 8.26 | 19 kDa           | 1                          | 6.60%               |
| Uroporphyrinogen decarboxylase                       | DCUP_MOUSE                 | Urod      | 6.21 | 41 kDa           | 3                          | 9.00%               |
| Desmoplakin                                          | DESP_MOUSE                 | Dsp       | 6.43 | 333 kDa          | 2                          | 0.80%               |
| Elongation factor 1-alpha 1                          | EF1A1_MOUSE                | Eef1a1    | 9.1  | 50 kDa           | 6                          | 16%                 |
| Elongation factor 1-delta                            | EF1D_MOUSE                 | Eef1d     | 4.91 | 31 kDa           | 2                          | 8.50%               |
| Elongation factor 2                                  | EF2_MOUSE                  | Eef2      | 6.42 | 95 kDa           | 4                          | 4.50%               |
| 55 kDa erythrocyte membrane protein                  | EM55_MOUSE                 | Mpp1      | 6.72 | 52 kDa           | 3                          | 7.50%               |
| Alpha-enolase                                        | ENOA_MOUSE                 | Eno1      | 6.36 | 47 kDa           | 2                          | 9.70%               |
| Endoplasmic                                          | ENPL_MOUSE                 | Hsp90b1   | 4.72 | 92 kDa           | 3                          | 5.50%               |
| Erythrocyte membrane protein band 4.2                | EPB42_MOUSE                | Epb42     | 6.98 | 77 kDa           | 2                          | 3.30%               |
| Ezrin                                                | EZRI_MOUSE                 | Ezr       | 5.83 | 69 kDa           | 6                          | 10%                 |
| Coagulation factor V                                 | FA5_MOUSE                  | F5        | 5.66 | 247 kDa          | 4                          | 2.60%               |
| Alpha-2-HS-glycoprotein                              | FETUA_MOUSE                | Ahsg      | 5.94 | 37 kDa           | 2                          | 9.90%               |
| Fibrinogen beta chain                                | FIBB_MOUSE                 | Fgb       | 3.53 | 55 kDa           | 13                         | 35%                 |
| Fibrinogen gamma chain                               | FIBG_MOUSE                 | Fgg       | 5.55 | 49 kDa           | 13                         | 34%                 |

**SUPPLEMENTARY TABLE 2**

| Identified Proteins                         | SWISSProt Accession Number | Gene Name | pI   | Molecular Weight | Unique Peptides Identified | % Sequence Coverage |
|---------------------------------------------|----------------------------|-----------|------|------------------|----------------------------|---------------------|
| Tubulin beta-1 chain                        | TBB1_MOUSE                 | Tubb1     | 4.96 | 50 kDa           | 3                          | 15%                 |
| Tubulin beta-4B chain                       | TBB4B_MOUSE                | Tubb4b    | 4.79 | 50 kDa           | 11                         | 30%                 |
| Tubulin beta-5 chain                        | TBB5_MOUSE                 | Tubb5     | 4.78 | 50 kDa           | 2                          | 24%                 |
| Transitional endoplasmic reticulum ATPase   | TERA_MOUSE                 | Vcp       | 5.14 | 89 kDa           | 4                          | 6.20%               |
| Transferrin receptor protein 1              | TFR1_MOUSE                 | Tfrc      | 6.13 | 86 kDa           | 11                         | 18%                 |
| Talin-1                                     | TLN1_MOUSE                 | Tln1      | 5.84 | 270 kDa          | 16                         | 8.20%               |
| Serotransferrin                             | TRFE_MOUSE                 | Tf        | 6.81 | 77 kDa           | 3                          | 4.60%               |
| Thrombospondin-1                            | TSP1_MOUSE                 | Thbs1     | 4.71 | 130 kDa          | 3                          | 2.60%               |
| Ubiquitin-like modifier-activating enzyme 1 | UBA1_MOUSE                 | Uba1      | 5.43 | 118 kDa          | 2                          | 3.10%               |
| Ubiquitin-conjugating enzyme E2 O           | UBE2O_MOUSE                | Ube2o     | 4.94 | 141 kDa          | 3                          | 3.50%               |
| Fermitin family homolog 3                   | URP2_MOUSE                 | Fermt3    | 6.6  | 76 kDa           | 4                          | 8.10%               |
| Vinculin                                    | VINC_MOUSE                 | Vcl       | 5.77 | 117 kDa          | 10                         | 11%                 |
| Vitronectin                                 | VTNC_MOUSE                 | Vtn       | 5.56 | 55 kDa           | 7                          | 17%                 |
